# Supplementary material for: Electrochemical Immunosensors Based on Screen-Printed Gold and Glassy Carbon Electrodes: Comparison of Performance for Respiratory Syncytial Virus Detection
Source: PubMed Central journal article supplement (PMC7698328; doi:10.3390/bios10110175), 2020-11-13
Supplement: biosensors-10-00175-s001.pdf [file biosensors-10-00175-s001.pdf]

## Electrochemical immunosensors based on screen-printed gold and glassy carbon electrodes. Comparison of performance for Respiratory Syncytial Virus detection.

Wioletta Białobrzęska <sup>1,2,\*</sup>, Daniel Firganek <sup>1</sup>, Maciej Czerkies <sup>3</sup>, Tomasz Lipniacki <sup>3</sup>, Marta Skwarecka <sup>1</sup>, Karolina Dziąbowska <sup>1,2</sup>, Zofia Cebula <sup>1</sup>, Natalia Malinowska <sup>2</sup>, Daniel Bigus <sup>1</sup>, Ewelina Biega <sup>1</sup>, Krzysztof Pyrc <sup>4</sup>, Katarzyna Pala <sup>2</sup>, Sabina Żołądowska <sup>1,2</sup>, Dawid Nidzworski <sup>1,2</sup>

<sup>1</sup> Institute of Biotechnology and Molecular Medicine, 3 Trzy Lipy St., 80-172 Gdansk, Poland

<sup>2</sup> SensDx, 14b Postępu St., 02-676 Warszawa, Poland

<sup>3</sup> Institute of Fundamental Technological Research Polish Academy of Sciences, Pawińskiego 5B, 02-106 Warszawa, Poland

<sup>4</sup> Malopolska Centre of Biotechnology, Jagiellonian University, Gronostajowa 7, 30-387 Krakow, Poland

\* Correspondence: e-mail: wioletta.bialobrzęska@etongroup.eu

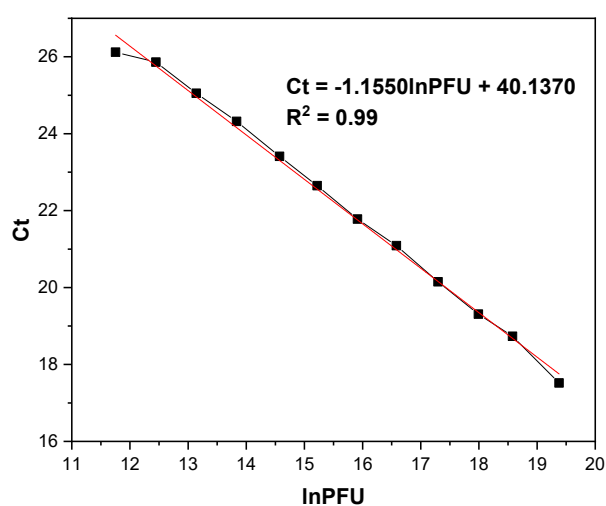

**Figure S1.** The standard curve of RSV quantification from qPCR.

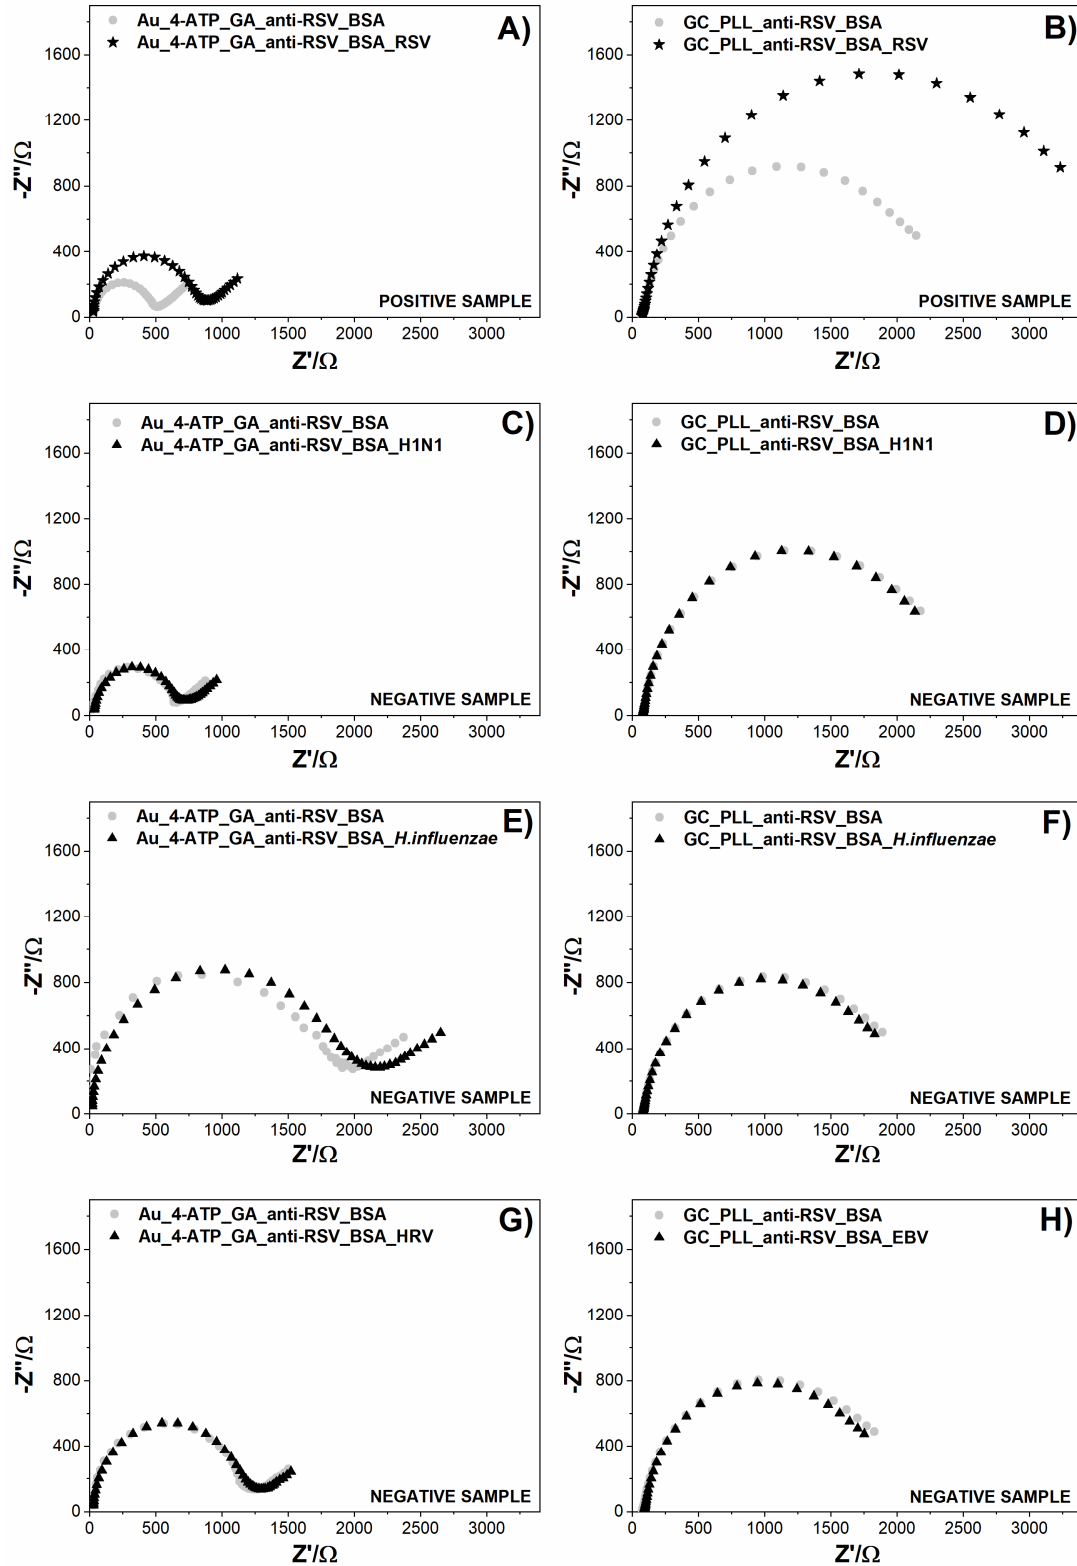

**Figure S2.** Impedance spectra recorded after incubation with RSV and interfering pathogens. Registered in 5 mM  $K_3[Fe(CN)_6]/K_4[Fe(CN)_6]/0.01$  M PBS.
